# Supplementary material
Source: MDPI journal article supplement (https://www.mdpi.com/1661-3821/3/4/42)
Supplement: s1 [file s1]

Supplementary Information

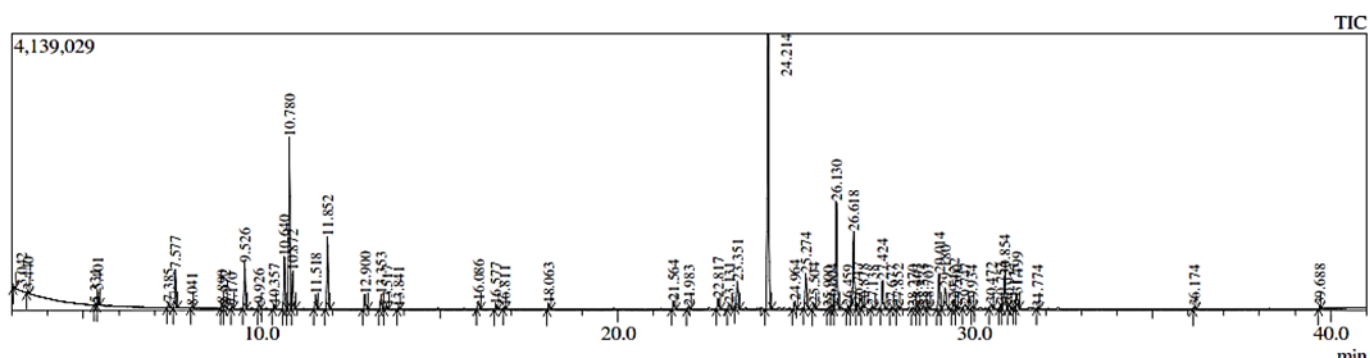

Figure S1. Chromatogram of *Croton piauiensis* essential oil collected at 6:00 am.

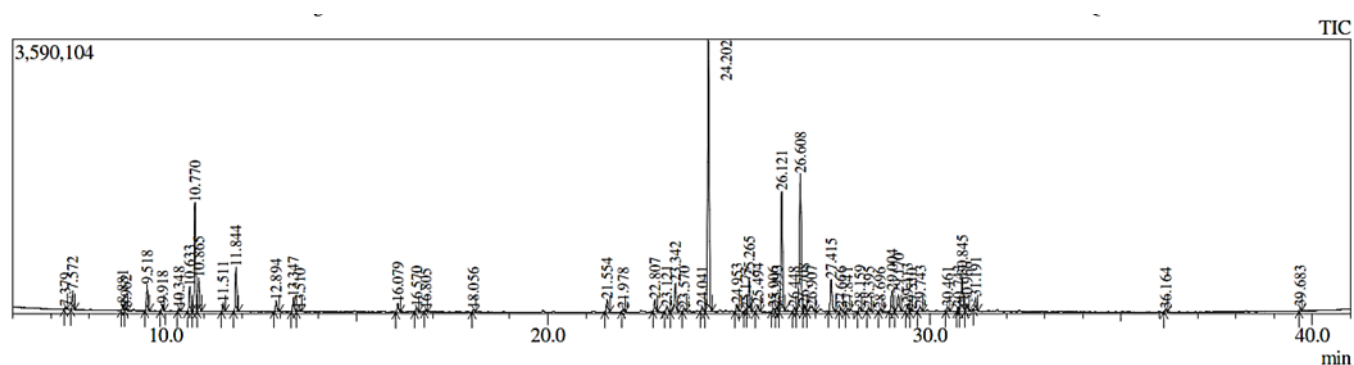

Figure S2. Chromatogram of *Croton piauiensis* essential oil collected at 12:00 am.

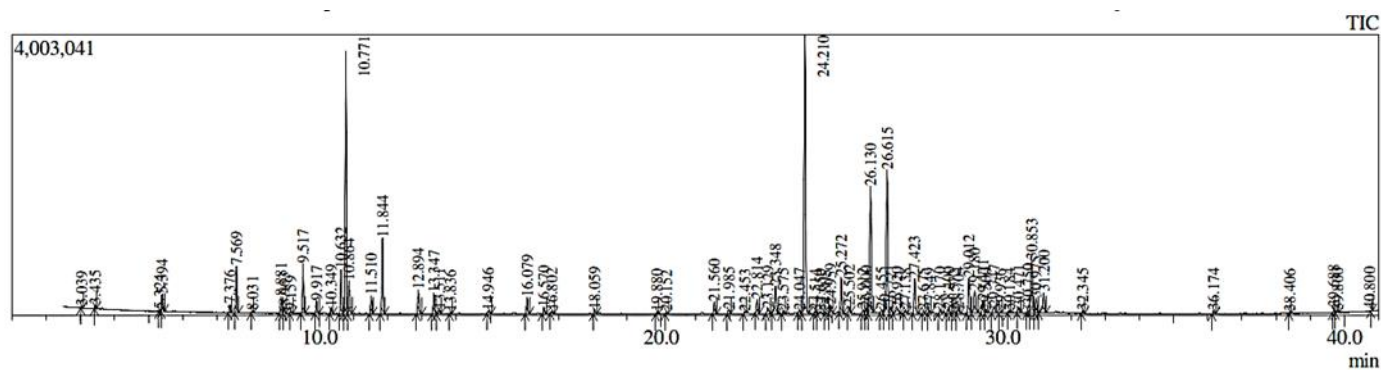

Figure S3. Chromatogram of *Croton piauiensis* essential oil collected at 18:00 pm.
