# Supplementary material
Source: MDPI journal article supplement (https://www.mdpi.com/1661-3821/3/4/42)
Supplement: s1 [file s1]

Archive with 1 entries (1 files):
- nutraceuticals-2602089-supplementary.pdf
